# Supplementary material
Source: HighWire-hosted journal article supplement (doi:10.1101/rna.058404.116)
Supplement: SuppFig1.docx [file SuppFig1.docx]

**SUPPLEMENTAL FIGURE LEGEND**

**Supplemental Figure 1. Alternative predicted secondary structures.** The second (top) and third (bottom) lowest energy secondary structure predictions for both NMIA (left) and 1M6 (right) are depicted with the corresponding SHAPE reactivity values for each nucleotide color coded. Calculated energies are listed for each prediction. For reference, the lowest energy predictions yielded energies of -205.5 kcal/mol (NMIA) and -205.8 kcal/mol (1M6).

**Supplemental Figure 1.**

**
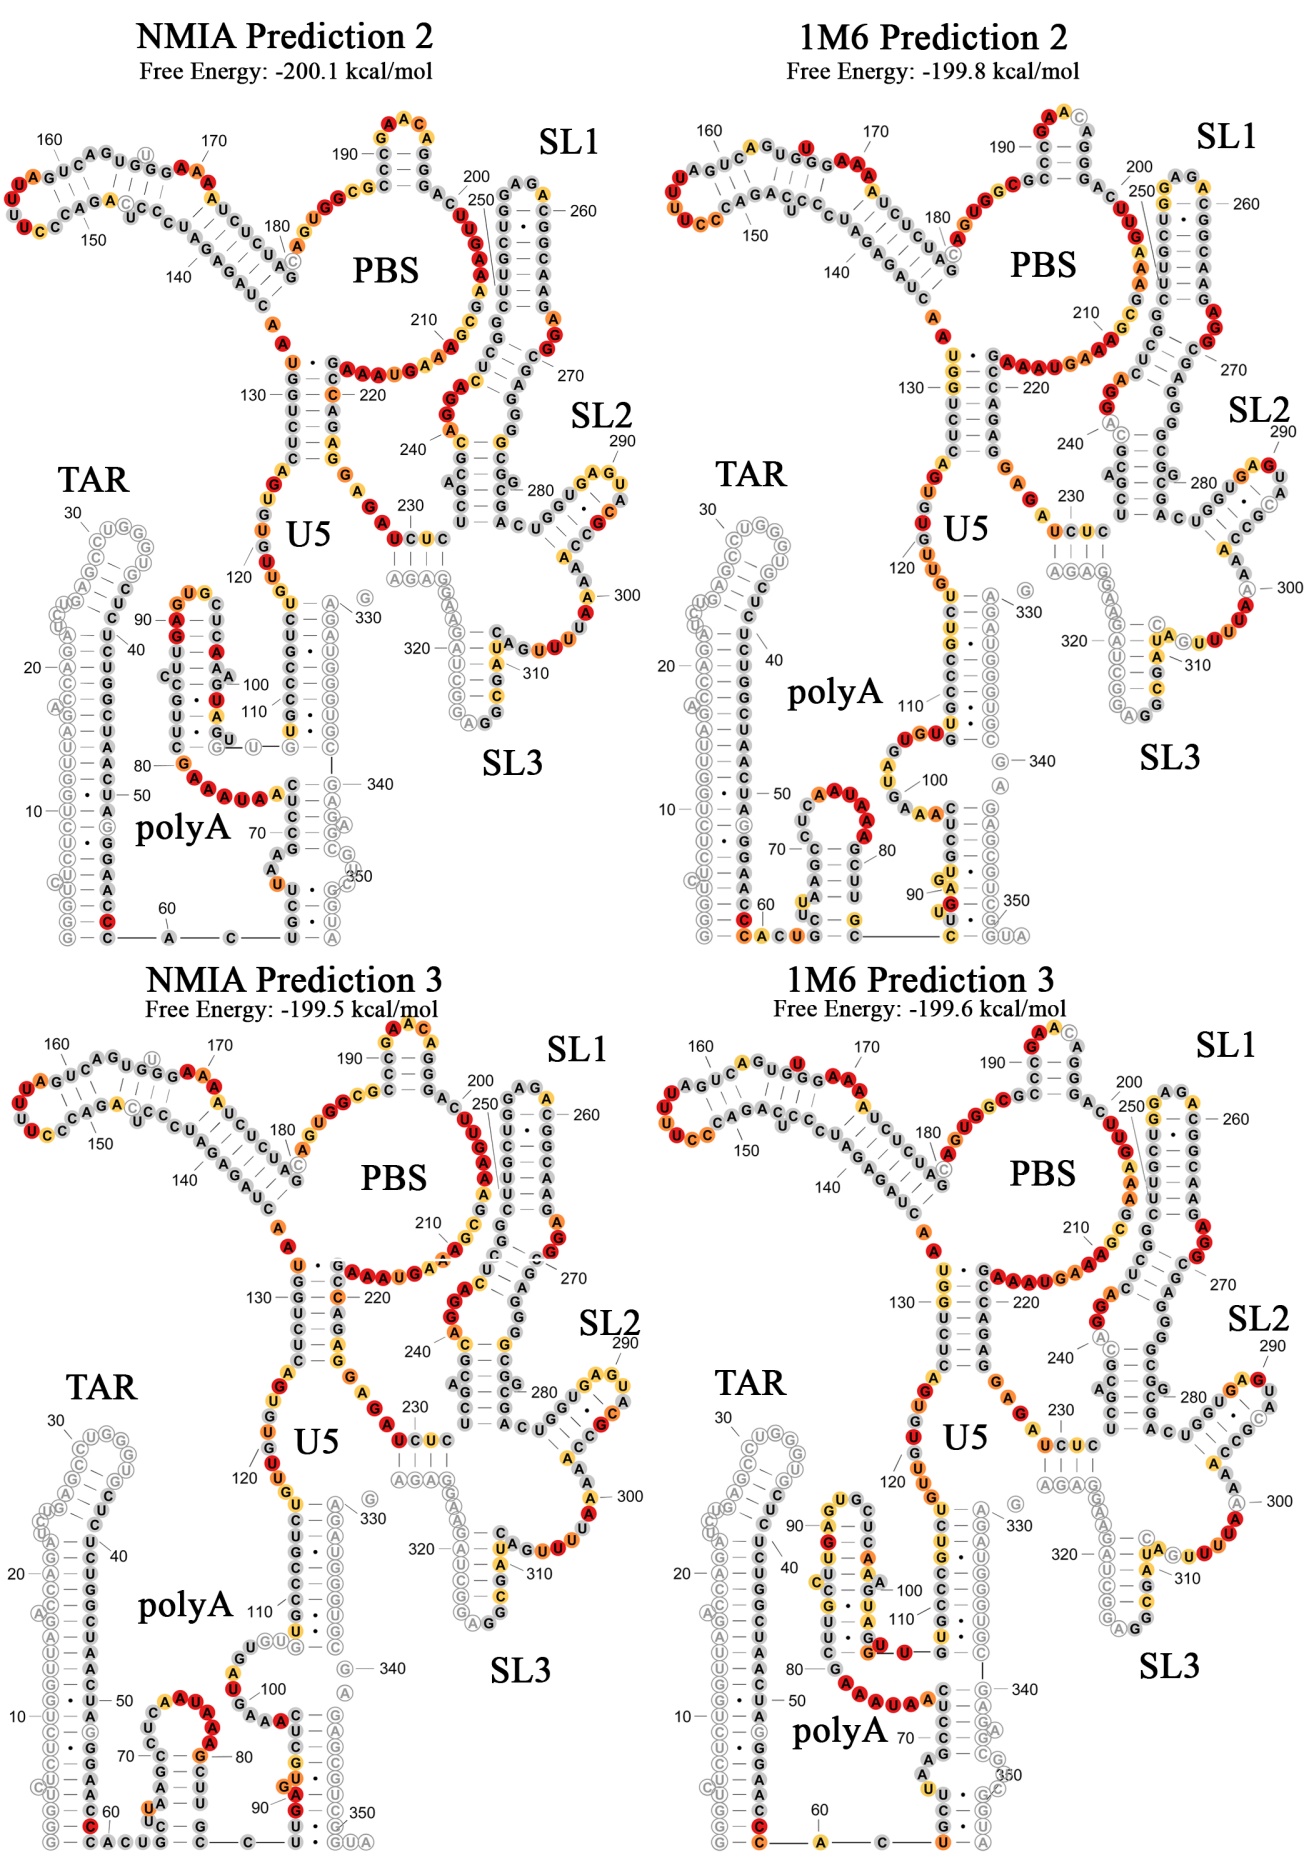
**
